1 **MicroRNAs from the parasitic plant *Cuscuta campestris* target host messenger**

2 **RNAs**

3

4 Saima Shahid<sup>1,2</sup>, Gunjune Kim<sup>3</sup>, Nathan R. Johnson<sup>1,2</sup>, Eric Wafula<sup>2</sup>, Feng Wang<sup>1,2,4</sup>,

5 Ceyda Coruh<sup>1,2,5</sup>, Vivian Bernal-Galeano<sup>3</sup>, Claude W. dePamphilis<sup>1,2</sup>, James H.

6 Westwood<sup>3</sup>, and Michael J. Axtell<sup>1,2</sup>

7

8 <sup>1</sup> Intercollege Ph.D. Program in Plant Biology, Huck Institutes of the Life Sciences, Penn

9 State University, University Park, PA 16802 USA

10 <sup>2</sup> Department of Biology, Penn State University, University Park, PA 16802 USA

11 <sup>3</sup> Department of Plant Pathology, Physiology and Weed Science, Virginia Polytechnic

12 Institute and State University, Blacksburg, VA 24061, USA.

13 <sup>4</sup> Current Address: Department of Biology, Indiana University, Bloomington IN 47405,

14 USA

15 <sup>5</sup> Current Address: Salk Institute for Biological Studies, La Jolla, CA 92037, USA

16

17 **First paragraph:**

18         Dodders (*Cuscuta* spp.) are obligate parasitic plants that obtain water and

19 nutrients from the stems of host plants via specialized feeding structures called

20 haustoria. Dodder haustoria facilitate bi-directional movement of viruses, proteins, and

21 mRNAs between host and parasite<sup>1</sup>, but the functional effects of these movements are

22 not clear. Here we show that *C. campestris* haustoria accumulate high levels of many

23 novel microRNAs (miRNAs) while parasitizing *Arabidopsis thaliana* hosts. Many of

24 these miRNAs are 22 nts long, a usually rare size of plant miRNA associated with  
25 amplification of target silencing through secondary small interfering RNA (siRNA)  
26 production<sup>2</sup>. Several *A. thaliana* mRNAs are targeted by *C. campestris* 22 nt miRNAs  
27 during parasitism, resulting in mRNA cleavage, high levels of secondary siRNA  
28 production, and decreased mRNA accumulation levels. Hosts with a mutation in the  
29 target *SIEVE ELEMENT OCCLUSION RELATED 1* (*SEOR1*) supported significantly  
30 higher growth of *C. campestris*. Homologs of target mRNAs from diverse plants also  
31 have predicted target sites to induced *C. campestris* miRNAs, and several of the same  
32 miRNAs are expressed when *C. campestris* parasitizes a second host, *Nicotiana*  
33 *benthamiana*. These data show that *C. campestris* miRNAs act as *trans*-species  
34 regulators of host gene expression, and suggest that they may act as virulence factors  
35 during parasitism.

36  
37 Host-induced gene silencing (HIGS) involves plant transgenes that produce  
38 siRNAs which can silence targeted pathogen/parasite mRNAs in *trans*<sup>3,4</sup>. Plant-based  
39 HIGS is effective against fungi<sup>5</sup>, nematodes<sup>6</sup>, insects<sup>7</sup>, and the parasitic plant *C.*  
40 *pentagona*<sup>8</sup>. The apparent ease with which plant-based HIGS functions suggests that  
41 plants might also exchange naturally occurring small RNAs during pathogen and  
42 parasite interactions. Consistent with this hypothesis, small RNAs from the plant  
43 pathogenic fungus *Botrytis cinerea* target host mRNAs during infection<sup>9</sup>, and HIGS  
44 targeting *Botrytis Dicer-Like* mRNAs reduces pathogen virulence<sup>10</sup>. Conversely, the  
45 conserved miRNAs miR159 and miR166 can be exported from cotton into the fungal

46 pathogen *Verticillium dahliae* where they target fungal mRNAs encoding virulence  
47 factors<sup>11</sup>.

48 We hypothesized that naturally occurring small RNAs might be exchanged  
49 across the *C. campestris* haustorium and affect gene expression in the recipient  
50 species. To test this hypothesis, we profiled small RNA expression from *C. campestris*  
51 grown on *A. thaliana* hosts using high-throughput small RNA sequencing (sRNA-seq).  
52 Two biological replicates each from three tissues were analyzed: Parasite stem (PS),  
53 comprising a section of *C. campestris* stem above the site of haustorium formation;  
54 Interface (I), comprising *C. campestris* stem with haustoria with associated *A. thaliana*  
55 stem tissue; and Host stem (HS), comprising sections of *A. thaliana* stems above the  
56 interface region, as previously described<sup>12</sup>. Sequenced small RNAs were designated as  
57 host-derived or parasite-derived based on alignment to the *A. thaliana* reference  
58 genome assembly and expression analysis of HS vs. PS samples. Host-derived reads  
59 were aligned to the *A. thaliana* reference genome assembly, while parasite-derived  
60 sRNA-seq reads were initially clustered by sequence similarity (Supplementary Data 1).

61 151 *C. campestris* small RNAs were differentially expressed between I and PS  
62 samples (Supplementary Data 2), most of which (136) were up-regulated in I relative to  
63 PS (Figure 1A). RNA blots confirmed the strong accumulation in I samples for several  
64 tested small RNAs (Figure 1B). Whole-genome shotgun DNA sequence data from *C.*  
65 *campestris* were used to produce short, local genome assemblies containing the 136  
66 interface-induced small RNAs. This allowed alignment of all parasite-derived small  
67 RNAs to these genomic loci. We were then able to discern microRNA loci from other  
68 small RNA loci by virtue of stereotypical predicted hairpins and accumulation of

69 miRNA/miRNA\* duplexes (Supplementary Data 3-5). Most of the interface up-regulated  
 70 *C. campestris* small RNAs were found to be 22 or 21 nt miRNAs (Figures 1C-D;  
 71 Supplementary Data 3-5). The prevalence of 22 nt miRNAs in *C. campestris* is  
 72 unprecedented: in all plant species previously annotated 21 nt miRNAs are much more  
 73 prevalent than 22 nt miRNAs (miRBase version 21<sup>13</sup>). 22 nt plant miRNAs are strongly  
 74 associated with secondary siRNA accumulation from their targets<sup>14,15</sup>. Secondary  
 75 siRNAs are thought to amplify the strength of miRNA-directed gene silencing<sup>2</sup>.  
 76 -----

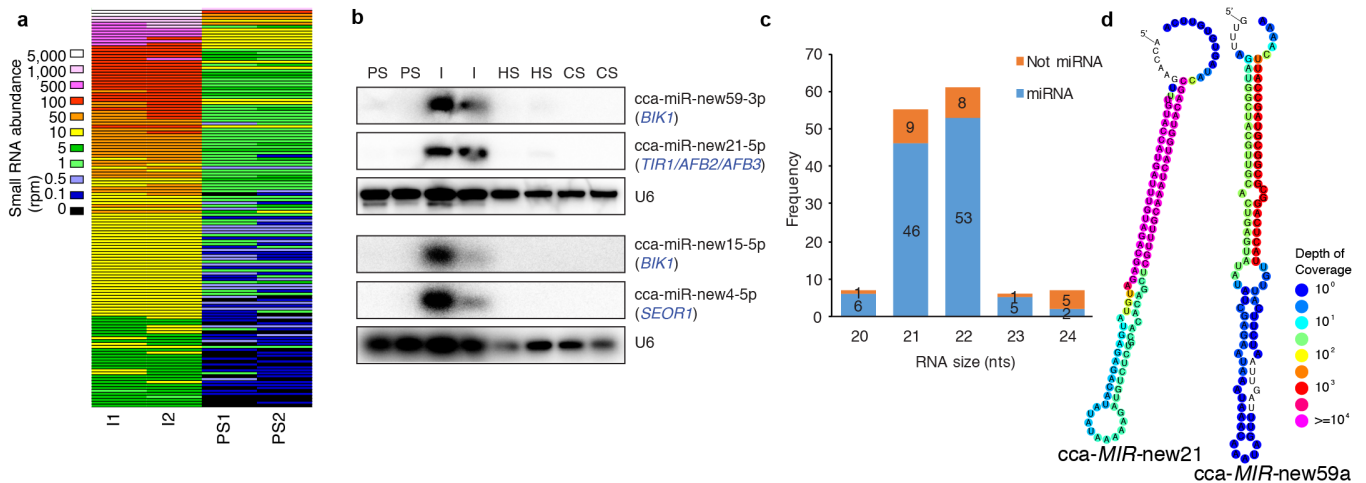

77  
 78 **Figure 1.** *C. campestris* miRNAs induced at the haustorial interface. **a)** Heatmap  
 79 showing accumulation of 136 *C. campestris* small RNAs that are significantly (FDR =  
 80 0.05) more than two-fold higher in interface relative to parasite stem samples. I:  
 81 Interface, PS: Parasite stem, rpm: reads per million. **b)** Small RNA blots. *A. thaliana*  
 82 gene names in parentheses are targets of the probed small RNA. HS: *A. thaliana* host  
 83 stems above the point of attachment, CS: control (un-parasitized) *A. thaliana* stems. **c)**  
 84 Tally of sizes and types for the 136 induced *C. campestris* small RNAs. **d)** Examples of  
 85 *C. campestris* MIRNA hairpins producing 22 nt miRNAs. Predicted RNA secondary

86 structures are overlaid with colors representing depth of small RNA sequencing. See  
87 Supplementary Data 3-5 for details.

88 -----

89

90 Differential expression analysis of *A. thaliana* small RNAs found six loci induced  
91 in I relative to HS samples (Figure 2A-B, Extended Data Figure 1, Supplementary Data  
92 6), each deriving from *A. thaliana* mRNAs with known functions: *TIR1*, *AFB2*, and *AFB3*,  
93 which encode related and partially redundant auxin receptors<sup>16</sup>, *BIK1*, which encodes a  
94 plasma membrane-localised kinase required for both pathogen-induced and  
95 developmental signaling<sup>17,18</sup>, *SEOR1*, which encodes a major phloem protein that  
96 accumulates in filamentous networks in sieve tube elements and reduces photosynthate  
97 loss from the phloem upon injury<sup>19,20</sup>, and *SCHIZORHIZA/HSFB4*, which encodes a  
98 predicted transcriptional repressor that is required to maintain stem-cell identity in  
99 roots<sup>21-23</sup>. The induced siRNAs from these mRNAs resembled secondary siRNAs in  
100 their size distributions, double-stranded accumulation, and phasing (Figure 2A-B;  
101 Extended Data Figure 1).

102 Each of these six mRNAs has either one or two complementary sites to interface-  
103 induced *C. campestris* 22 nt miRNAs (Figure 2A-B; Extended Data Figure 1). The *TIR1*,  
104 *AFB2*, and *AFB3* mRNAs are also targeted by the conserved miRNA, miR393, at  
105 distinct sites (Extended Data Figure 1). Analysis of uncapped mRNA fragments using 5'-  
106 RNA ligase-mediated rapid amplification of cDNA ends (5'-RLM-RACE) found strong  
107 evidence for miRNA-directed cleavage at all of the complementary sites to *C.*  
108 *campestris* miRNAs, specifically from interface samples but not from control stem



121 samples. miRNA complementary sites are shown with alignments above. Fractions  
122 indicate numbers of 5'-RLM-RACE clones with 5'-ends at the indicated positions; red  
123 color highlights the predicted slicing site. Barchart shows the length and polarity  
124 distribution of *SEOR1*-mapped siRNAs. Radar chart shows the fraction of siRNAs in  
125 each of the 21 possible phasing registers; the register highlighted in magenta is the one  
126 predicted by the miRNA target site. **b)** As in a, except for *A. thaliana BIK1*. Extended  
127 Data Figure 1 shows similar plots for four other mRNAs. **c)** 5'-RLM-RACE products from  
128 nested amplifications for the indicated cDNAs. Numbers below cDNA names give the  
129 expected size of the products in base-pairs (bp). First and last lanes are size standards.  
130 I: interface, CS: control stem. *ARF17*, a known target of miR160, is a positive control.

131 -----

132

133       Accumulation of five of the six secondary siRNA-producing targets was  
134 significantly reduced in stems parasitized by *C. campestris* compared to un-parasitized  
135 stems ( $p < 0.05$ ; Figure 3A), consistent with miRNA-mediated repression. The true  
136 magnitude of repression for these targets could be even greater, since many miRNAs  
137 also direct translational repression. Accumulation of many known *A. thaliana* secondary  
138 siRNAs is often partially dependent on the endonuclease Dicer-Like 4 (DCL4) and  
139 wholly dependent on RNA-Dependent RNA polymerase 6 (RDR6/SGS2/SDE1)<sup>2</sup>.  
140 Accumulation of an abundant secondary siRNA from *TIR1* was eliminated entirely in the  
141 *sgs2-1* mutant, and reduced in the *dcl4-2t* mutant (Figure 3B). Thus host *DCL4* and  
142 *RDR6/SGS2/SDE1* are required for secondary siRNA production, strongly implying that  
143 the *C. campestris* derived miRNAs are active inside of host cells.

144

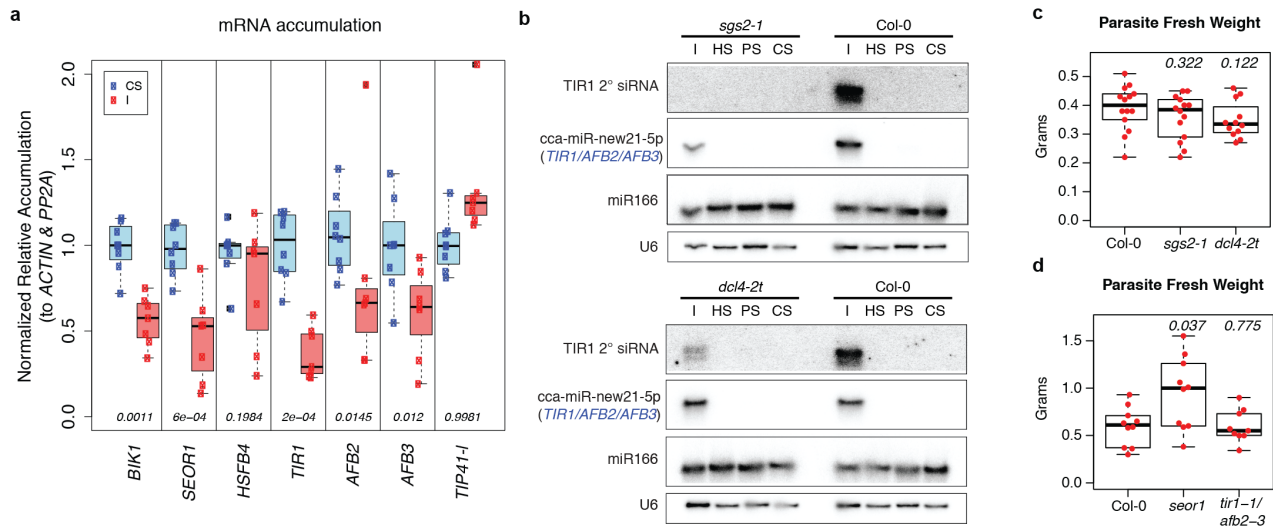

145

146 **Figure 3.** Effects of *C. campestris* miRNAs and their targets. **a)** *A. thaliana* mRNA  
 147 accumulation levels in I (interface) vs. CS (control stems) during *C. campestris*  
 148 parasitism, assessed by qRT-PCR. Data from 7 or 8 biological replicates are plotted  
 149 (dots), and boxplots indicate the median (horizontal lines), 1st-3rd quartile range  
 150 (boxes), and up to 1.5 x the interquartile range (whiskers). Numbers indicate p-values  
 151 comparing CS and I samples (Wilcoxon rank-sum test, unpaired, one-tailed). *TIP41-I* is  
 152 a control mRNA. **b)** RNA blots from *C. campestris* infestations of the indicated *A.*  
 153 *thaliana* genotypes. I: interface, HS: host stem, PS: parasite stem, CS: control stem. **c)**  
 154 Accumulation of *C. campestris* biomass on *A. thaliana* hosts of the indicated genotypes  
 155 18 days post-attachment. P-values (Wilcoxon rank-sum tests, unpaired, two-tailed) from  
 156 comparison of mutant to wild-type (*Col-0*) are shown. Boxplot conventions as in panel a.  
 157 n=14, 14, and 12 for *Col-0*, *sgs2-1*, and *dcl4-2t*, respectively. **d)** As in c, except for  
 158 *seor1* and *tir1-1/afb2-3*. n=10, 10, and 9 for *Col-0*, *seor1*, and *tir1-1/afb2-3*, respectively.

149

160



161 In repeated trials with varying methodologies we did not observe consistent  
162 significant differences in parasite fresh weight using *dcl4-2t* and *sgs2-1* mutants as  
163 hosts (Figure 3C, Extended Data Figure 3). This implies that loss of induced secondary  
164 siRNAs is not sufficient to detectably affect parasite biomass accumulation. We also  
165 observed no significant difference in growth on a *tir1-1/afb2-3* double mutant (Figure  
166 3D). However, there was a significant increase ( $p = 0.037$ ) of parasite fresh weight after  
167 growth on the *seor1* mutant (Figure 3D). This demonstrates that *SEOR1*, which is  
168 targeted by a *C. campestris* miRNA during parasitism, restricts growth of *C. campestris*.

169 *C. campestris* has a broad host range, primarily among eudicots<sup>24</sup>. Therefore, we  
170 searched for miRNA complementary sites for the six relevant *C. campestris* miRNAs in  
171 eudicot orthologs of *TIR1*, *AFB2*, *AFB3*, *SEOR1*, *BIK1*, and *HSFB4*. We used *GAPDH*  
172 orthologs with the same six miRNAs as a negative control query, and *PHV* orthologs  
173 with a miR166 query<sup>25</sup> as a positive control. Probable orthologs of *BIK1*, *SEOR1*, and  
174 *TIR/AFB* were predicted targets of interface-induced miRNAs in many eudicot species,  
175 while predicted targets in probable *HSFB4* orthologs were less frequent (Figure 4A,  
176 Supplementary Data 7). We conclude that the induced *C. campestris* miRNAs  
177 collectively would be able to target *TIR1*, *AFB2*, *AFB3*, *SEOR1*, and *BIK1* orthologs in  
178 many eudicot species, and *HSFB4* in some species.

179 -----

180



200 provided strong evidence for cleavage of an *N. benthamiana* *TIR1/AFB* ortholog by a *C.*  
201 *campestris* miRNA (Figures 4C-D; Extended Data Figure 4). This directly demonstrates  
202 that some of the same *C. campestris* miRNAs are expressed upon interaction with  
203 different species of host plants, and that at least one orthologous host mRNA is targeted  
204 in multiple species. None of the interface-induced miRNAs we tested were detectable  
205 from *C. campestris* pre-haustoria sampled from seedling tips that had coiled around  
206 dead bamboo stakes instead of a live host (Figure 4B; Extended Data Figure 5). This  
207 suggests that expression of these miRNAs requires prior contact with a living host.

208         These data demonstrate that *C. campestris* induces a large number of miRNAs  
209 in the functional haustorium, and that some of them direct cleavage of host mRNAs and  
210 reduce their accumulation. Many of the induced miRNAs are 22 nts long, and  
211 associated with secondary siRNA production from their host targets. Several of the  
212 targets are functionally linked to plant pathogenesis: Manipulation of *TIR1/AFB2/AFB3*  
213 accumulation levels affects bacterial pathogenesis and defense signaling<sup>26</sup>. The BIK1  
214 kinase is a central regulator of pathogen-induced signaling<sup>27</sup>, and kinase-dependent  
215 pathogen signaling is known to play a key role in tomato resistance against *C. reflexa*<sup>28</sup>.  
216 Perhaps the most intriguing target is *SEOR1*, which encodes a very abundant protein  
217 present in large, filamentous agglomerations in phloem sieve-tube elements<sup>19</sup>. *seor1*  
218 mutants have an increased loss of sugars from detached leaves<sup>20</sup>, and our data show  
219 that *seor1* mutants also support increased *C. campestris* biomass accumulation. A key  
220 function of the *C. campestris* haustorium is to take nutrients from the host phloem;  
221 targeting *SEOR1* could be a strategy to increase sugar uptake from host phloem for the  
222 benefit of the parasite. Overall, these data suggest that *C. campestris* *trans*-species

223 miRNAs might function as virulence factors to remodel host gene expression to its  
224 advantage during parasitism.

225

226 **Methods** [separate online only document].

227

## 228 **References**

- 229 1. Kim, G. & Westwood, J. H. Macromolecule exchange in Cuscuta-host plant  
230 interactions. *Curr Opin Plant Biol* **26**, 20–25 (2015).
- 231 2. Fei, Q., Xia, R. & Meyers, B. C. Phased, Secondary, Small Interfering RNAs in  
232 Posttranscriptional Regulatory Networks. *Plant Cell* **25**, 2400–2415 (2013).
- 233 3. Baulcombe, D. C. VIGS, HIGS and FIGS: small RNA silencing in the interactions  
234 of viruses or filamentous organisms with their plant hosts. *Curr Opin Plant Biol* **26**,  
235 141–146 (2015).
- 236 4. Weiberg, A., Bellinger, M. & Jin, H. Conversations between kingdoms: small  
237 RNAs. *Curr. Opin. Biotechnol.* **32**, 207–215 (2015).
- 238 5. Nowara, D. *et al.* HIGS: host-induced gene silencing in the obligate biotrophic  
239 fungal pathogen *Blumeria graminis*. *Plant Cell* **22**, 3130–3141 (2010).
- 240 6. Huang, G., Allen, R., Davis, E. L., Baum, T. J. & Hussey, R. S. Engineering broad  
241 root-knot resistance in transgenic plants by RNAi silencing of a conserved and  
242 essential root-knot nematode parasitism gene. *Proc Natl Acad Sci USA* **103**,  
243 14302–14306 (2006).
- 244 7. Baum, J. A. *et al.* Control of coleopteran insect pests through RNA interference.  
245 *Nat Biotechnol* **25**, 1322–1326 (2007).

- 246 8. Alakonya, A. *et al.* Interspecific RNA interference of SHOOT MERISTEMLESS-  
247 like disrupts *Cuscuta pentagona* plant parasitism. *Plant Cell* **24**, 3153–3166  
248 (2012).
- 249 9. Weiberg, A. *et al.* Fungal small RNAs suppress plant immunity by hijacking host  
250 RNA interference pathways. *Science* **342**, 118–123 (2013).
- 251 10. Wang, M. *et al.* Bidirectional cross-kingdom RNAi and fungal uptake of external  
252 RNAs confer plant protection. *Nature Plants* **2**, 16151 (2016).
- 253 11. Zhang, T. *et al.* Cotton plants export microRNAs to inhibit virulence gene  
254 expression in a fungal pathogen. *Nature Plants* **2**, 16153 (2016).
- 255 12. Kim, G., LeBlanc, M. L., Wafula, E. K., dePamphilis, C. W. & Westwood, J. H.  
256 Plant science. Genomic-scale exchange of mRNA between a parasitic plant and  
257 its hosts. *Science* **345**, 808–811 (2014).
- 258 13. Kozomara, A. & Griffiths-Jones, S. miRBase: annotating high confidence  
259 microRNAs using deep sequencing data. *Nucleic Acids Res* **42**, D68–73 (2014).
- 260 14. Chen, H.-M. *et al.* 22-Nucleotide RNAs trigger secondary siRNA biogenesis in  
261 plants. *Proc Natl Acad Sci USA* **107**, 15269–15274 (2010).
- 262 15. Cuperus, J. T. *et al.* Unique functionality of 22-nt miRNAs in triggering RDR6-  
263 dependent siRNA biogenesis from target transcripts in *Arabidopsis*. *Nat Struct*  
264 *Mol Biol* (2010). doi:10.1038/nsmb.1866
- 265 16. Dharmasiri, N. *et al.* Plant development is regulated by a family of auxin receptor  
266 F box proteins. *Dev Cell* **9**, 109–119 (2005).
- 267 17. Veronese, P. *et al.* The membrane-anchored BOTRYTIS-INDUCED KINASE1  
268 plays distinct roles in *Arabidopsis* resistance to necrotrophic and biotrophic

- 269 pathogens. *Plant Cell* **18**, 257–273 (2006).
- 270 18. Lin, W. *et al.* Inverse modulation of plant immune and brassinosteroid signaling  
271 pathways by the receptor-like cytoplasmic kinase BIK1. *Proc Natl Acad Sci USA*  
272 **110**, 12114–12119 (2013).
- 273 19. Froelich, D. R. *et al.* Phloem ultrastructure and pressure flow: Sieve-Element-  
274 Occlusion-Related agglomerations do not affect translocation. *Plant Cell* **23**,  
275 4428–4445 (2011).
- 276 20. Jekat, S. B. *et al.* P-proteins in Arabidopsis are heteromeric structures involved in  
277 rapid sieve tube sealing. *Front Plant Sci* **4**, 225 (2013).
- 278 21. Mylona, P., Linstead, P., Martienssen, R. & Dolan, L. SCHIZORIZA controls an  
279 asymmetric cell division and restricts epidermal identity in the Arabidopsis root.  
280 *Development* **129**, 4327–4334 (2002).
- 281 22. Pernas, M., Ryan, E. & Dolan, L. SCHIZORIZA controls tissue system complexity  
282 in plants. *Curr Biol* **20**, 818–823 (2010).
- 283 23. Hove, ten, C. A. *et al.* SCHIZORIZA encodes a nuclear factor regulating  
284 asymmetry of stem cell divisions in the Arabidopsis root. *Curr Biol* **20**, 452–457  
285 (2010).
- 286 24. Dawson, J. H., Musselman, L. J., Wolswinkel, P. & Dörr, I. Biology and control of  
287 *Cuscuta*. *Reviews of Weed Science* **6**, 265–317 (1994).
- 288 25. Floyd, S. K. & Bowman, J. L. Gene regulation: ancient microRNA target  
289 sequences in plants. *Nature* **428**, 485–486 (2004).
- 290 26. Robert-Seilaniantz, A. *et al.* The microRNA miR393 re-directs secondary  
291 metabolite biosynthesis away from camalexin and towards glucosinolates. *Plant J*

292           **67**, 218–231 (2011).

293   27.   Lu, D. *et al.* A receptor-like cytoplasmic kinase, BIK1, associates with a flagellin  
294           receptor complex to initiate plant innate immunity. *Proc Natl Acad Sci USA* **107**,  
295           496–501 (2010).

296   28.   Hegenauer, V. *et al.* Detection of the plant parasite *Cuscuta reflexa* by a tomato  
297           cell surface receptor. *Science* **353**, 478–481 (2016).

298

299

### 300   **Acknowledgements**

301   We thank the Penn State & Huck Institutes Genomics Core Facility for small RNA-seq  
302   services. We thank Hervé Vaucheret, Michael Knoblauch, and Gabriele Monshausen for  
303   gifts of *sgs2-1*, *seor1*, and *tir1-1/afb2-3* mutant seed, respectively. We thank Beth  
304   Johnson for advice on growing conditions for *C. campestris*. Purchase of the Illumina  
305   HiSeq2500 used for small RNA-seq was funded by a major research instrumentation  
306   award from the US National Science Foundation [1229046 to MJA and CWD]. This  
307   research was supported in part by an award from the US National Science Foundation  
308   [1238057 to JHW and CWD] and the National Institute of Food and Agriculture [135997  
309   to JHW].

310

311   **Author Contributions:** SS and MJA performed most bioinformatics analysis. SS, MJA,  
312   and NRJ prepared figures and tables. GK and JHW cultivated and harvested plant  
313   specimens used for initial small RNA-seq experiments. NRJ, SS, and MJA cultivated  
314   and harvested plant specimens for other experiments. EW, GK, CWD, and JHW

315 performed whole-genome shotgun DNA sequencing. FW, SS, and NRJ performed RNA  
316 blots. SS and MJA performed 5'-RLM-RACE and qRT-PCR. CC constructed small RNA-  
317 seq libraries. NRJ and VB performed growth assays. MJA and JHW conceived of the  
318 project. MJA wrote and revised the manuscript with input from all other authors.

319

### 320 **Author Information**

321 Small RNA-seq data from this work are available at NCBI GEO under accession  
322 GSE84955.

323

324 The authors declare no competing financial interests

325

326 Correspondence and requests for materials should be addressed to Michael J. Axtell at  
327 [mja18@psu.edu](mailto:mja18@psu.edu)

328

329

330





335 *thaliana* transcripts are shown in blue for host stem (HS), interface (I), and parasite  
336 stem (PS) samples. For display, the two biological replicates of each type were merged.  
337 y-axis is in units of reads per million. Red mark and vertical lines show position of  
338 complementary sites to *C. campestris* miRNAs, with the alignments shown above.  
339 Fractions indicate numbers of 5'-RLM-RACE clones with 5'-ends at the indicated  
340 positions; the locations in red are the predicted sites for miRNA-directed slicing  
341 remnants. Barcharts show the length and polarity distribution of transcript-mapped  
342 siRNAs. Radar charts show the fractions of siRNAs in each of the 21 possible phasing  
343 registers; the registers highlighted in magenta are the ones predicted by the miRNA  
344 target sites.  
345

346

347

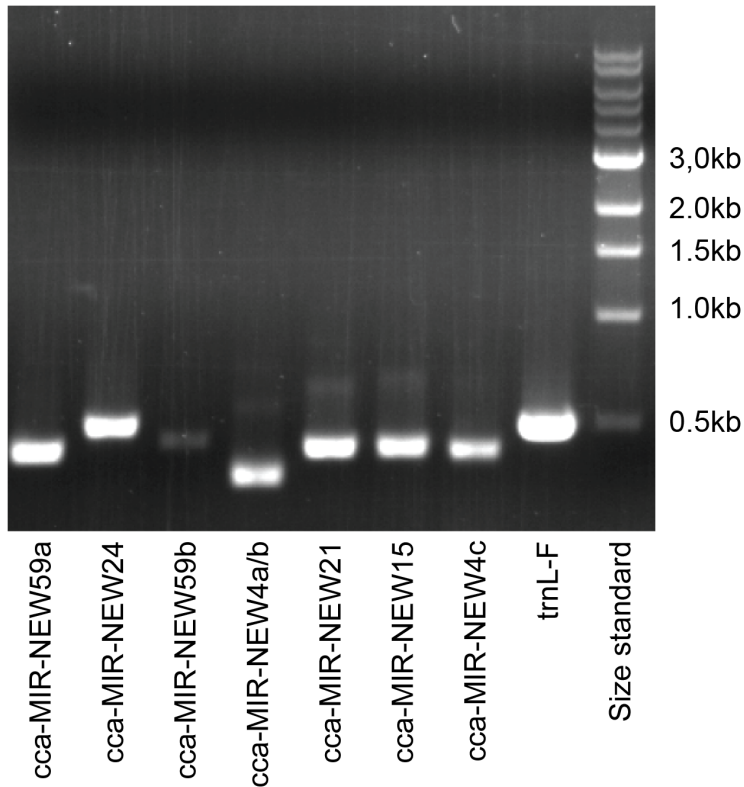

348

349 **Extended Data Figure 2.** PCR of *C. campestris* MIRNA loci. The template for PCR was

350 genomic DNA isolated from *C. campestris* seedlings four days after germination; the

351 seedlings had never attached to nor been near a host plant, ruling out host DNA

352 contamination. trnL-F: Positive control plastid locus.

353

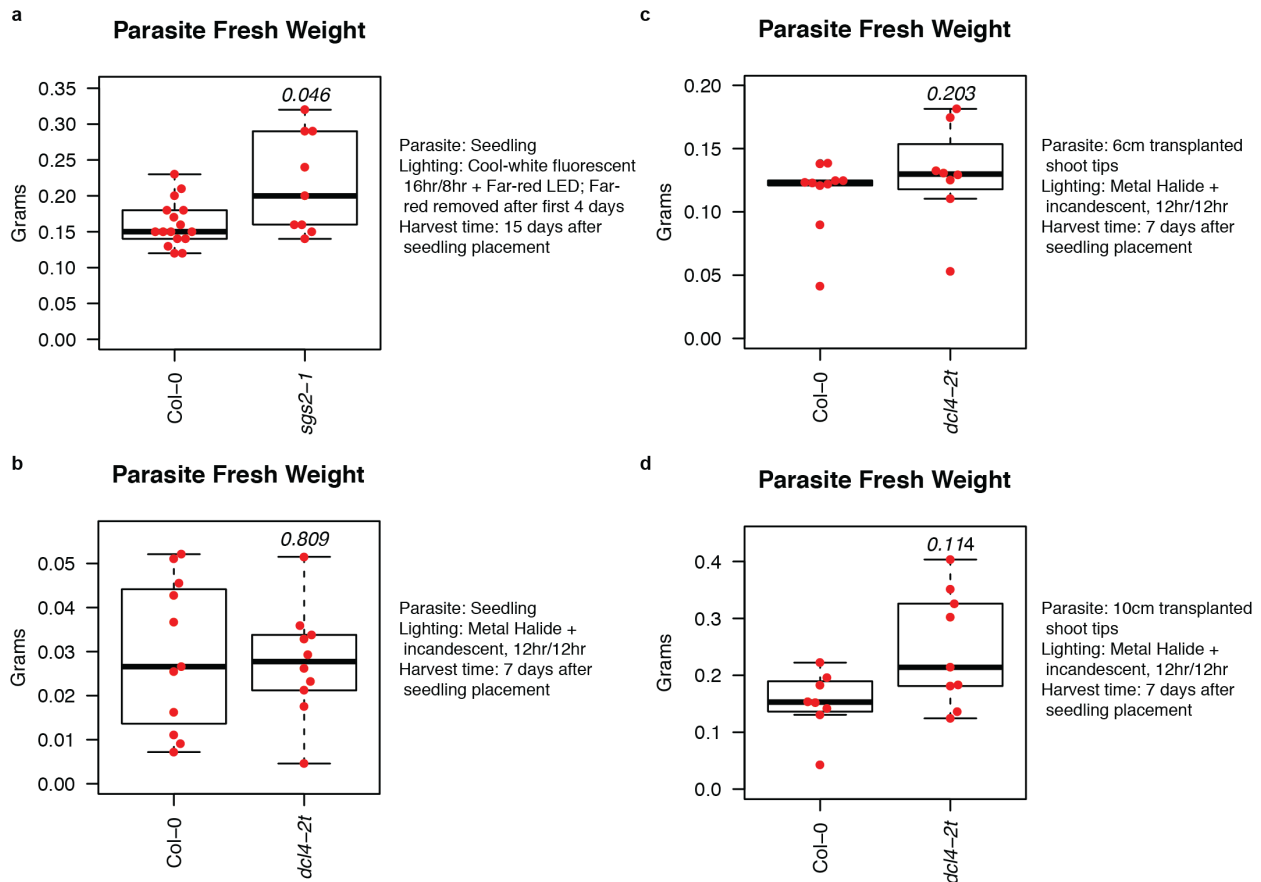

354

355

356 **Extended Data Figure 3.** Growth of *C. campestris* on *A. thaliana* *sgs2-1* and *dcl4-2t*

357 mutants with varying methodologies, as indicated. P-values (Wilcoxon rank-sum tests,

358 unpaired, two-tailed) from comparison of mutant to wild-type (Col-0) are shown. Dots

359 show all data points. Boxplots represent medians (horizontal lines), the central half of

360 the data (boxes), and other data out to 1.5 times the interquartile range (whiskers). **a)**

361 n=16 and 9 for Col-0 and *sgs2-1*, respectively. **b)** n=11 and 10 for Col-0 and *dcl4-2t*,

362 respectively. **c)** n=10 and 8 for Col-0 and *dcl4-2t*, respectively. **d)** n=8 and 9 for Col-0

363 and *dcl4-2t*, respectively.

364

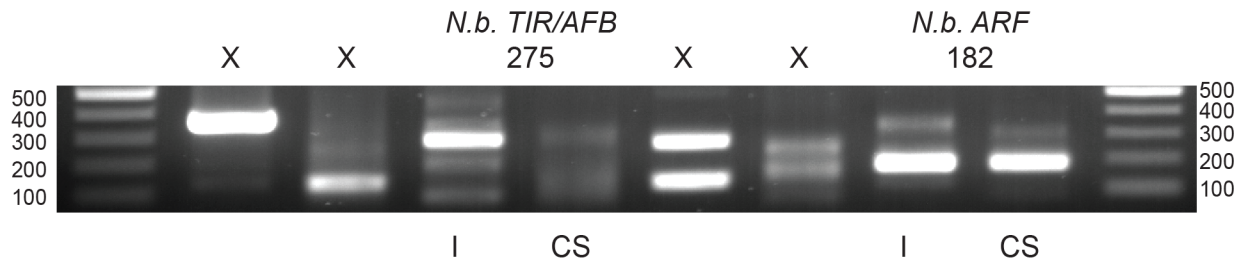

365

366

367 **Extended Data Figure 4.** Uncropped image of *N. benthamiana* 5'-RLM-RACE products.

368 Lanes with 'X' are irrelevant to this study. This is the uncropped version of the image in

369 Figure 4C.

370

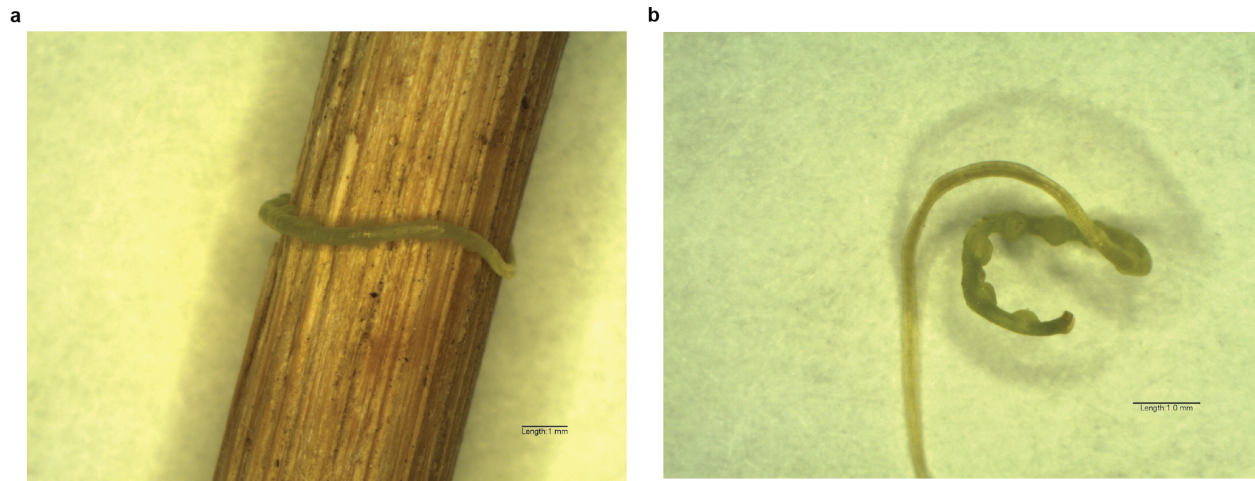

371

372

373 **Extended Data Figure 5.** *C. campestris* prehaustoria. **a)** *C. campestris* seedling wound

374 around a bamboo stake. **b)** The same seedling, removed from the stake to show the

375 prominent pre-haustorial bumps. Seedling was scarified, germinated on moist paper

376 towels for three days at ~28C, and then placed next to bamboo stake for four days with

377 far-red LED lighting. Approximately 30 such seedlings were used for the 'PH' RNA in

378 Figure 4B. Scales bars: 1mm.

379

380

381 **METHODS**

382 **Germplasm**

383 *Cuscuta* was initially obtained from a California tomato field, and seed stocks derived  
384 from self-pollination through several generations in the Westwood laboratory. The  
385 isolate was initially identified as *Cuscuta pentagona* (Engelm.) *C. pentagona* is very  
386 closely related to *C. campestris* (Yunck.), and the two are distinguished by microscopic  
387 differences in floral anatomy; because of this they have often been confused<sup>1</sup>. We  
388 subsequently determined that our isolate is indeed *C. campestris*. *Arabidopsis thaliana*  
389 *sgs2-1* mutants<sup>2</sup> were a gift from Hervé Vaucheret. *A. thaliana dcl4-2t* mutants  
390 (GABI\_160G05<sup>3</sup>) were obtained from the Arabidopsis Biological Resource Center. *A.*  
391 *thaliana seor* mutants (GABI-KAT 609F04<sup>4</sup>) were a gift from Michael Knoblauch. *A.*  
392 *thaliana tir1-1/afb2-3* double-mutants<sup>5</sup> were a gift from Gabriele Monshausen. All *A.*  
393 *thaliana* mutants were in the Col-0 background.

394

395 **Growth conditions and RNA extractions**

396 For initial experiments (small RNA-seq and RNA blots in Figure 1) *A. thaliana* (Col-0)  
397 plants were grown in a growth room at 18-20°C with 12-h light per day, illuminated (200  
398  $\mu\text{mol m}^{-2}\text{s}^{-1}$ ) with metal halide (400W, GE multi-vapor lamp) and spot-gro (65W,  
399 Sylvania) lamps. *C. campestris* seeds were scarified in concentrated sulfuric acid for  
400 45 min, followed by 5-6 rinses with distilled water and dried. *C. campestris* seeds were  
401 placed in potting medium at the base of four-week-old *A. thaliana* seedlings and allowed  
402 to germinate and attach to hosts. The *C. campestris* plants were allowed to grow and  
403 spread on host plants for an additional three weeks to generate a supply of uniform

404 shoots for use in the experiment. Sections of *C. campestris* shoot tip (~10 cm long)  
405 were placed on the floral stem of a fresh set of *A. thaliana* plants. Parasite shoots coiled  
406 around the host stems and formed haustorial connections. Tissues from plants that had  
407 established *C. campestris* with at least two coils around healthy host stems and clear  
408 parasite growth were used in these studies. Control plants were grown under the same  
409 conditions as parasitized plants, but were not exposed to *C. campestris*.

410 For the preparation of tissue-specific small RNA libraries, tissues were harvested  
411 after *C. campestris* cuttings had formed active haustorial connections to the host. This  
412 was evidenced by growth of the *C. campestris* shoot to a length of at least 10 cm  
413 beyond the region of host attachment (7-10 d after infection). Three tissues were  
414 harvested from the *A. thaliana*-*C. campestris* associations: 1) 2.5 cm of *A. thaliana* stem  
415 above the region of attachment, 2) *A. thaliana* and *C. campestris* stems in the region of  
416 attachment (referred to as the interface), 3) 2.5 cm of the parasite stem near the point of  
417 attachment. To remove any possible cross-contamination between *A. thaliana* and *C.*  
418 *campestris*, harvested regions of the parasite and host stem were taken 1 cm away  
419 from the interface region and each harvested tissue was surface cleaned by immersion  
420 for 5 min in 70% ethanol, the ethanol was decanted and replaced, the process was  
421 repeated three times and the stems were blotted dry with a Kimwipe after the final rinse.  
422 All three sections of tissue were harvested at the same time and material from 20  
423 attachments were pooled for small RNA extraction. Small RNA was extracted from ~  
424 100 mg of each tissue using the mirPremier microRNA Isolation Kit (Sigma-Aldrich, St.  
425 Louis, MO, USA) according to the manufacturer's protocol. Small RNA was analyzed  
426 using an Agilent small RNA Kit on a 2100 Bioanalyzer platform.



427 Samples used for RNA ligase-mediated 5' rapid amplification of cDNA ends (5'-  
428 RLM-RACE; Figure 2C) and quantitative reverse-transcriptase polymerase chain  
429 reaction (qRT-PCR; Figure 3A) analyses of *A. thaliana* targets were prepared as  
430 described above with the following modifications: Col-0 *A. thaliana* hosts were cultivated  
431 in a growth room with 16 hr. days, 8 hr. nights, at ~23C, under cool-white fluorescent  
432 lamps, attachment of *C. campestris* cuttings was promoted by illumination with far-red  
433 LED lighting for 3-5 days, and total RNA was extracted using Tri-reagent (Sigma) per  
434 the manufacturer's suggestions, followed by a second sodium-acetate / ethanol  
435 precipitation and wash step. Samples used for RNA blots of secondary siRNA  
436 accumulation from *A. thaliana* mutants (Figure 3B) were obtained similarly, except that  
437 the samples derived from the primary attachments of *C. campestris* seedlings on the  
438 hosts instead of from cuttings. In these experiments, scarified *C. campestris* seedlings  
439 were first germinated on moistened paper towels for three days at ~28C, then placed  
440 adjacent to the host plants with their radicles submerged in a water-filled 0.125ml tube.

441 *C. campestris* pre-haustoria (Extended Data Figure 5) were obtained by  
442 scarifying, germinating and placing seedlings as described above, next to bamboo  
443 stakes in soil, under illumination from cool-white fluorescent lights and far-red emitting  
444 LEDs. Seedlings coiled and produced pre-haustoria four days after being placed, and  
445 were harvested and used for total RNA extraction (used for RNA blot in Figure 4B)  
446 using Tri-reagent as described above. *Nicotiana benthamiana* was grown in a growth  
447 room with 16 hr. days, 8 hr. nights, at ~23C, under cool-white fluorescent lamps. Three  
448 to four week old plants served as hosts for scarified and germinated *C. campestris*  
449 seedlings. Attachments were promoted by three-six days with supplementation by far-

450 red emitting LEDs. Under these conditions, *C. campestris* attached to the petioles of the  
451 *N. benthamiana* hosts, not the stems. Interfaces and control petioles from un-  
452 parasitized hosts were collected 7-8 days after successful attachments, and total RNA  
453 (used for RNA blot in Figure 4B) recovered using Tri-reagent as described above.

454

#### 455 **Initial sRNA-seq data processing**

456 Small RNA-seq libraries were constructed using the Illumina Tru-Seq small RNA kit per  
457 the manufacturer's protocol and sequenced on an Illumina HiSeq2500 instrument. Raw  
458 sRNA-seq reads were trimmed to remove 3'-adapters, and filtered for quality and  
459 trimmed length  $\geq 16$  nts using cutadapt<sup>6</sup> version 1.9.1 with settings "-a  
460 TGGAATTCTCGGGTGCCAAGG --discard-untrimmed -m 16 --max-n=0". Trimmed  
461 reads that aligned with zero or one mismatch (using bowtie<sup>7</sup> version 1.1.2, settings "-v  
462 1") to the *A. thaliana* plastid genome, the *C. gronovii* plastid genome (*C. gronovii* was  
463 the closest relative to *C. campestris* that had a publically available completed plastid  
464 genome assembly available), *A. thaliana* rRNAs, tRNAs, snRNAs, or snoRNAs were  
465 removed. The remaining 'clean' reads were then aligned to the combined TAIR10 *A.*  
466 *thaliana* reference genome and TAIR10 reference cDNAs, demanding perfect matches,  
467 using bowtie<sup>7</sup> version 1.1.2 with settings "-v 0". Sequences that matched were initially  
468 designated as host-derived, while those that didn't were initially designated as parasite-  
469 derived. Species of origin assignments were then adjusted based on comparing  
470 expression levels in the host stem (HS) vs. parasite stem (PS) samples. Let  $HS_{rpm}$   
471 indicate the summed reads-per-million value in both HS samples, and  $HS_{raw}$  indicate the  
472 summed number of raw reads in both HS samples, and similarly for  $PS_{rpm}$  and  $PS_{raw}$ .

473 For *A. thaliana*-matched sequences, if  $HS_{rpm} / (HS_{rpm} + PS_{rpm}) = 0$  or if  $HS_{rpm} / (HS_{rpm} +$   
474  $PS_{rpm}) \leq 0.05$  and  $HS_{raw} + PS_{raw} \geq 5$ , the sequence was re-assigned to be in the  
475 parasite-derived set. Similarly, for sequences not exactly matched to *A. thaliana*, if  
476  $HS_{rpm} / (HS_{rpm} + PS_{rpm}) = 1$  or if  $HS_{rpm} / (HS_{rpm} + PS_{rpm}) \geq 0.95$  and  $HS_{raw} + PS_{raw} \geq 5$ ,  
477 the sequence was re-assigned to the host-derived set. *A. thaliana*-matched RNAs  
478 switched to the parasite-derived set likely include small RNAs conserved in both  
479 species but primarily expressed by *C. campestris*. RNAs that don't match the *A. thaliana*  
480 genome or transcriptome that were switched to the host-derived set likely include RNAs  
481 with sequencing errors, or non-templated nucleotides, which are frequent<sup>8</sup>. Note that  
482 conserved small RNAs expressed by both species will be generally assigned as host-  
483 derived by this method.

484

#### 485 **Parasite-derived small RNA analysis**

486 Parasite-derived small RNAs between 20 and 24 nts in length were clustered according  
487 to sequence similarity. Beginning with a list of parasite-derived 20-24 nt RNA  
488 sequences sorted in descending order by abundance (summed across all libraries),  
489 each sequence was queried against all remaining others to find less abundant  
490 sequences within a Levenshtein edit distance of one or two. The most abundant  
491 sequence in each resulting cluster was termed the 'head', while all other variants were  
492 termed 'isos'. For computational expediency, this process was limited to 'heads' with a  
493 raw read count of 20 or more. Parasite-derived sequences with total read counts of less  
494 than 20 that were not found as 'isos' were discarded. This resulted in a total of 29,988

495 parasite-derived small RNA clusters. The 'head' sequences of each cluster were  
496 queried against all mature miRNAs from plants from miRBase<sup>9</sup> version 21; hits within a  
497 Levenshtein edit distance of two were recorded (Supplementary Data 1).

498 The total abundance in each cluster was calculated as the sum of read counts for  
499 the 'head' and all its 'iso' sequence variants. These sums were used for differential  
500 expression analysis comparing I vs. PS samples (null hypothesis: True difference no  
501 more than 2-fold, Benjamini-Hochberg false discovery rate = 0.05) using the R package  
502 DESeq2<sup>10</sup> (Supplementary Data 2). The 136 small RNA clusters that were higher in I  
503 relative to PS were further analyzed to search for evidence of miRNA-like biogenesis.  
504 Paired-end libraries (insert sizes of 200 bp, 340 bp, and 480 bp) and mate-pair libraries  
505 (insert sizes of 3 kb and 5 kb) were constructed and sequenced on the Illumina HiSeq  
506 2000 platform to obtain paired-end libraries with 100 x 100 nt reads. Data were adapter-  
507 trimmed and quality-filtered using cutadapt<sup>6</sup> version 1.9.1 with settings "-a  
508 AGATCGGAAGAGCACACGTCTGAACTCCAGTCA -A  
509 AGATCGGAAGAGCGTCGTGTAGGGAAAG -m 40 -q 10 --max-n 1". The resulting  
510 cleaned shotgun genomic reads were then queried to find those with exact matches to  
511 the 136 parasite-derived small RNAs found to have higher accumulation in I vs. PS.  
512 Genomic reads where the small RNA sequence match was within 10 nts from either the  
513 5' or 3' end of the genomic read were retained and used to predict putative RNA  
514 secondary structures using RNAfold<sup>11</sup>. Genomic reads whose predicted RNA secondary  
515 structure resembled *MIRNA* hairpins were retained and aligned against one another to  
516 determine local genomic assemblies. The local assemblies were consolidated based on  
517 all vs. all BLAST analysis to remove redundancy (in some cases multiple parasite small

518 RNAs align to the same local assembly) and annotate families of related sequences  
519 (Supplementary Data 3). The parasite-derived small RNAs were aligned against the  
520 final set of local genome assemblies housing putative *MIRNA* hairpins using ShortStack  
521 3.4<sup>12</sup> with settings "--nostitch --bowtie\_cores 5 --sort\_mem 4G --ranmax 20". Small  
522 RNA alignment patterns relative to predicted secondary structures were visualized with  
523 strucVis (<https://github.com/MikeAxtell/srucVis/>) version 0.2 (Supplementary Data 4,  
524 Supplementary Data 5). A draft genome assembly of *C. campestris* (Westwood,  
525 dePamphiis, et al., manuscript in prep.) was used to identify larger flanking regions for  
526 selected *C. campestris* *MIRNAs*, allowing design of PCR primers (Supplementary Data  
527 8) to amplify the loci directly from *C. campestris* genomic DNA (Extended Data Figure  
528 2).

529

### 530 **Host-derived small RNA analysis**

531 The final set of host-derived reads were aligned to the TAIR10 *A. thaliana* nuclear  
532 genome using ShortStack<sup>12</sup> version 3.4 with settings "--bowtie\_cores 5 --sort\_mem 4G -  
533 -nostitch --mincov 1rpm", resulting in the definition of 36,918 small RNA-producing  
534 genomic intervals from *A. thaliana*. Small RNA accumulation from these clusters was  
535 analyzed to find differentially expressed clusters between I and HS samples (null  
536 hypothesis: True difference no more than 2-fold, Benjamini-Hochberg false discovery  
537 rate = 0.05) using the R package DESeq2<sup>10</sup> (Supplementary Data 6). Because most  
538 differentially-expressed clusters from this genome-wide analysis overlapped annotated  
539 transcripts (mRNAs or pri-*MIRNAs*), the host-derived small RNA reads were re-

540 analyzed by alignment to the TAIR10 representative cDNA models using ShortStack  
541 version 3.4 with settings "--nohp --nostitch --bowtie\_cores 5 --sort\_mem 4G" and a "--  
542 locifile" specifying the full-length of each transcript as a pre-defined locus. Differentially  
543 expressed loci between I and HS were identified as described above (Supplementary  
544 Data 6).

545

### 546 **RNA blots**

547 Small RNA gel blots were performed as previously described<sup>13</sup> with modifications. For  
548 the blots in Figure 1B, small RNAs (1.8 micrograms) from each sample were separated  
549 on 15% TBE-Urea Precast gels (Bio-Rad), transblotted onto the Hybond NX membrane  
550 and cross-linked using 1-ethyl-3-(3-dimethylammonipropyl) carbodiimide<sup>14</sup>. Hybridization  
551 was carried out in 5×SSC, 2×Denhardt's Solution, 20 mM sodium phosphate (pH 7.2),  
552 7% SDS with 100 µg/ml salmon testes DNA (Sigma-Aldrich). Probe labeling,  
553 hybridization and washing were performed as described<sup>13</sup>. Radioactive signals were  
554 detected using Typhoon FLA 7000 (GE Healthcare). Membranes were stripped in  
555 between hybridizations by washing with 1% SDS for 15 min at 80°C and exposed for at  
556 least 24 h to verify complete removal of probe before re-hybridization. Sequences of  
557 probes are listed below. Blots in Figures 3B and 4B were performed similarly, except  
558 that 12 micrograms of total RNA were used instead. Probe sequences are listed in  
559 Supplementary Data 8.

### 560 **5' RNA ligase-mediated rapid amplification of cDNA ends (5'-RLM-RACE)**

561 Five micrograms of total RNA were ligated to one microgram of a 44 nucleotide RNA  
562 adapter (Supplementary Data 8) using a 20ul T4 RNA ligase 1 reaction (NEB) per the  
563 manufacturer's instructions for a one-hour incubation at 37C. The reaction was then  
564 diluted with 68ul of water and 2ul of 0.5M EDTA pH 8.0, and incubated at 65C for 15  
565 minutes to inactivate the ligase. Sodium acetate pH5.2 was added to a final  
566 concentration of 0.3M, and the RNA precipitated with ethanol. The precipitated and  
567 washed RNA was resuspended in 10ul of water. 3.33ul of this sample was used as the  
568 template in a reverse transcription reaction using random primers and the Protoscript II  
569 reverse transcriptase (NEB) per the manufacturer's instructions. The resulting cDNA  
570 was used as template in first round PCR using a 5' primer matching the RNA adapter  
571 and a 3' gene-specific primer (Supplementary Data 8). 1ul of the first round PCR  
572 product was used as the template for nested PCR with nested primers (Supplementary  
573 Data 8). Gene-specific primers for *A. thaliana* cDNAs were based on the representative  
574 TAIR10 transcript models, while those for *N. benthamiana* cDNAs were based on the  
575 version 0.4.4 transcripts (Sol Genomics Network<sup>15</sup>). *N. benthamiana* TIR/AFB is  
576 transcript ID *NbS00011315g0112.1*; *N. benthamiana* ARF is transcript ID  
577 *NbS00059497g0003.1*. Bands were gel-purified from agarose gels and cloned into  
578 pCR4-TOPO (Life Tech). Inserts from individual clones were recovered by colony PCR  
579 and subject to Sanger sequencing.

580

581 **Quantitative reverse-transcriptase PCR (qRT-PCR)**

582 Total RNA used for qRT-PCR was first treated with DNaseI (RNase-free; NEB) per the  
583 manufacturer's instructions, ethanol precipitated, and resuspended. 2 micrograms of  
584 treated total RNA was used for cDNA synthesis using the High Capacity cDNA  
585 Synthesis Kit (Applied Biosystems) per the manufacturer's instructions. PCR reactions  
586 used PerfeCTa SYBR Green FastMix (Quanta bio) on an Applied Biosystems  
587 StepONE-Plus quantitative PCR system per the manufacturer's instructions. Primers  
588 (Supplementary Data 8) were designed to span the miRNA target sites, to ensure that  
589 only uncleaved mRNAs were measured. Three reference mRNAs were used: *ACTIN*,  
590 *PP2A* (*PP2A sub-unit PDF2; At1g13320*), and *TIP41-I* (*TIP41-like; At4g34270*)<sup>16</sup>. Raw  
591 Ct values were used to calculate relative normalized expression values to each  
592 reference mRNA separately, and the final analysis took the median relative expression  
593 values between the *ACTIN*- and *TIP41-I* normalized data.

594

### 595 ***C. campestris* growth assays**

596 *C. campestris* seedlings were scarified, pre-germinated, and placed next to hosts in  
597 0.125ml water-filled tubes under cool-white fluorescent lighting supplemented with far-  
598 red emitting LEDs (16hr day, 8hr night) at ~ 23C as described above. After a single  
599 attachment formed (4 days), far-red light supplementation was removed to prevent  
600 secondary attachments. After 18 more days of growth, entire *C. campestris* vines were  
601 removed and weighed (Figures 3C-3D). Multiple additional growth trials were performed  
602 specifically on the *dcl4-2t* and *sgs2-1* mutant hosts under varying conditions (Extended  
603 Data Figure 4): Trial one using *sgs2-1* used similar conditions except that harvest was



604 perform 11 days after removal of far-red light (Extended Data Figure 3A). Trial two  
605 examined *dcl4-2t* and used 3cm seedlings in a 12-h per day light cycle, illuminated (200  
606  $\mu\text{mol m}^{-2} \text{s}^{-1}$ ) with metal halide (400W, GE multi-vapor lamp) and spotgro (65W,  
607 Sylvania) lamps, and measured biomass seven days after attachment (Extended Data  
608 Figure 3B). Trials three and four were performed on *dcl4-2t* with the same growth  
609 regime and seven-day timing, except using 6cm and 10cm *C. campestris* shoot tips  
610 harvested from ~ 1 month old plants grown on beets (*Beta vulgaris*) as the starting  
611 material (Extended Data Figures 3C-D).

612

### 613 **miRNA target predictions**

614 To find probable orthologs for *Arabidopsis thaliana* genes of interest, the *A. thaliana*  
615 protein sequences were used as queries for a BLASTP analysis of the 31 eudicot  
616 proteomes available on Phytozome 11 (<https://phytozome.jgi.doe.gov/pz/portal.html#>).  
617 Transcript sequences for the top 100 hits were retrieved. Two miRNA query sets were  
618 prepared. The first contained mature miRNAs from interface-induced *C. campestris*  
619 *MIRNA* loci. For each locus in Supplemental Table 3, the sequence with a higher total  
620 read count was retained. Additionally, if the mature sequence from the other strand of  
621 the hairpin had at least 100 reads and began with a 5'-U, it was also put into the  
622 interface-induced query set. A second query set consisting of conserved miRNAs  
623 expressed by *C. campestris* was curated by taking all small RNA 'head' sequences (see  
624 above) that a) matched an annotated mature miRNA sequence from a plant species in  
625 miRBase 21, and b) had a ratio of HS / (HS + PS) of  $\leq 0.95$ . Targets were predicted

626 from the probable 31-species with a maximum score of 4.5 using targetfinder.pl  
627 (<https://github.com/MikeAxtell/TargetFinder/>) version 0.1. The *BIK1*, *SEOR1*, *TIR/AFB*,  
628 *HSFB4*, and *GAPDH* probable orthologs were searched against the interface-induced  
629 queries, while the *PHB/PHV/REV* probable orthologs were searched against the  
630 conserved miRNA queries.

631 *N. benthamiana* orthologs of *A. thaliana* *TIR1/AFB2/AFB3* and of *ARF17* were  
632 found based on BLAST-P searches against the version 0.4.4 *N. benthamiana* protein  
633 models at Sol Genomics Network<sup>15</sup>, and miRNA target sites for cca-miR-NEW21 and  
634 miR160, respectively, predicted using targetfinder.pl as above.

635

### 636 **Code availability**

637 ShortStack version 3.4<sup>12</sup> (small RNA-seq analysis), strucVis version 0.2 (visualization of  
638 predicted RNA secondary structures with overlaid small RNA-seq depths), and  
639 Shuffler.pl/targetfinder.pl version 0.1 (prediction of miRNA targets controlling for false  
640 discovery rate) are all freely available at <https://github.com/MikeAxtell>. Cutadapt version  
641 1.9.1<sup>6</sup> is freely available at <http://cutadapt.readthedocs.io/en/stable/index.html>. The R  
642 package DESeq2<sup>10</sup> is freely available at [http://www.](http://www.bioconductor.org/packages/release/bioc/html/DESeq2.html)  
643 [bioconductor.org/packages/release/bioc/html/DESeq2.html](http://www.bioconductor.org/packages/release/bioc/html/DESeq2.html).

644

### 645 **References Cited (Methods)**

646 1. Costea, M., García, M. A., Baute, K. & Stefanović, S. Entangled evolutionary  
647 history of *Cuscuta pentagona* clade: A story involving hybridization and Darwin in

- 648 the Galapagos. *Taxon* **64**, 1225–1242 (2015).
- 649 2. Elmayan, T. *et al.* Arabidopsis mutants impaired in cosuppression. *Plant Cell* **10**,  
650 1747–1758 (1998).
- 651 3. Xie, Z., Allen, E., Wilken, A. & Carrington, J. C. DICER-LIKE 4 functions in trans-  
652 acting small interfering RNA biogenesis and vegetative phase change in  
653 *Arabidopsis thaliana*. *Proc Natl Acad Sci USA* **102**, 12984–12989 (2005).
- 654 4. Froelich, D. R. *et al.* Phloem ultrastructure and pressure flow: Sieve-Element-  
655 Occlusion-Related agglomerations do not affect translocation. *Plant Cell* **23**,  
656 4428–4445 (2011).
- 657 5. Parry, G. *et al.* Complex regulation of the TIR1/AFB family of auxin receptors.  
658 *Proc Natl Acad Sci USA* **106**, 22540–22545 (2009).
- 659 6. Martin, M. Cutadapt removes adapter sequences from high-throughput  
660 sequencing reads. *EMBnet. journal* (2011).
- 661 7. Langmead, B., Trapnell, C., Pop, M. & Salzberg, S. L. Ultrafast and memory-  
662 efficient alignment of short DNA sequences to the human genome. *Genome Biol*  
663 **10**, R25 (2009).
- 664 8. Wang, F., Johnson, N. R., Coruh, C. & Axtell, M. J. Genome-wide analysis of  
665 single non-templated nucleotides in plant endogenous siRNAs and miRNAs.  
666 *Nucleic Acids Res* (2016). doi:10.1093/nar/gkw457
- 667 9. Kozomara, A. & Griffiths-Jones, S. miRBase: annotating high confidence  
668 microRNAs using deep sequencing data. *Nucleic Acids Res* **42**, D68–73 (2014).
- 669 10. Love, M. I., Huber, W. & Anders, S. Moderated estimation of fold change and  
670 dispersion for RNA-seq data with DESeq2. *Genome Biol* **15**, 550 (2014).

- 671 11. Lorenz, R. *et al.* ViennaRNA Package 2.0. *Algorithms Mol Biol* **6**, 26 (2011).
- 672 12. Johnson, N. R., Yeoh, J. M., Coruh, C. & Axtell, M. J. Improved Placement of  
673 Multi-Mapping Small RNAs. *G3 (Bethesda)* (2016). doi:10.1534/g3.116.030452
- 674 13. Cho, S. H., Coruh, C. & Axtell, M. J. miR156 and miR390 regulate tasiRNA  
675 accumulation and developmental timing in *Physcomitrella patens*. *Plant Cell* **24**,  
676 4837–4849 (2012).
- 677 14. Pall, G. S. & Hamilton, A. J. Improved northern blot method for enhanced  
678 detection of small RNA. *Nat Protoc* **3**, 1077–1084 (2008).
- 679 15. Bombarely, A. *et al.* A draft genome sequence of *Nicotiana benthamiana* to  
680 enhance molecular plant-microbe biology research. *Mol Plant Microbe Interact* **25**,  
681 1523–1530 (2012).
- 682 16. Czechowski, T., Stitt, M., Altmann, T., Udvardi, M. K. & Scheible, W.-R. Genome-  
683 wide identification and testing of superior reference genes for transcript  
684 normalization in *Arabidopsis*. *Plant Physiol* **139**, 5–17 (2005).
- 685
- 686

687 **SI Guide**

688

689 **Supplementary Data 1:** Clustered parasite-derived small RNAs. Tab-delimited text file,  
690 .zip compressed. Columns 1: Sequence name, Column 2: Sequence ID with embedded  
691 raw read counts from each of the six libraries, Column 3: Sequence, Column 4: Total  
692 counts, Column 5: Similarity to annotated mature miRNAs in miRBase 21. (x: no  
693 similarity within edit distance of 2, NA: not analyzed).

694

695 **Supplementary Data 2:** Differential expression analysis of *C. campestris* small RNA  
696 clusters. Excel (.xlsx) format.

697

698 **Supplementary Data 3:** *C. campestris* MIRNA loci. Excel (.xlsx) format.

699

700 **Supplementary Data 4:** Details of *C. campestris* MIRNA loci: Text-based sequences,  
701 predicted secondary structures, and aligned small RNA reads (all six libraries). Lower-  
702 case letters indicate small RNA bases that are mismatched to the genomic sequence.  
703 Plain-text (ASCII) format.

704

705 **Supplementary Data 5:** Post-script files showing *C. campestris* hairpins overlaid with  
706 color-codes representing total read-depth (all six libraries). Tar-achived/gzip-  
707 compressed set of post-script files.

708

709 **Supplementary Data 6:** Differential expression analysis of *A. thaliana* small RNA

710 clusters. Excel (.xlsx) format.

711

712 **Supplementary Data 7:** Predicted miRNA targets in multiple species for selected gene

713 families. Excel (.xlsx) format.

714

715 **Supplementary Data 8:** Oligonucleotide sequences. Excel (.xlsx) format.

716

717

718

719

720

721

722
